# Supplementary material
Source: ML conference proceedings conference paper supplement (https://openaccess.thecvf.com/content/ICCV2023/html/Chen_Deep_Multiview_Clustering_ICCV_2023_paper.html)
Supplement: Supplementary file 1 [file Chen_Deep_Multiview_Clustering_ICCV_2023_supplemental.pdf]

# Deep Multiview Clustering by Contrasting Cluster Assignments —Supplementary Material

Jie Chen<sup>1</sup>, Hua Mao<sup>2</sup>, Wai Lok Woo<sup>2</sup>, Xi Peng<sup>1\*</sup>

<sup>1</sup> College of Computer Science, Sichuan University, China

<sup>2</sup> Department of Computer and Information Sciences, Northumbria University

chenjie2010@scu.edu.cn; {hua.mao, wailok.woo}@northumbria.ac.uk;

pengx.gm@gmail.com

## 1. Additional Experiments

Table 1. Computation times (in seconds) of the other contrastive learning-based methods on all the datasets.

| Methods | MSRC-v1      | COIL-20       | Handwritten   | BDGP         | Scene-15      | MNIST-USPS    | Fashion       |
|---------|--------------|---------------|---------------|--------------|---------------|---------------|---------------|
| DSIMVC  | 676.78       | 480.59        | 2368.74       | 1234.33      | 1770.68       | 4236.72       | 2368.74       |
| DCP     | 106.69       | 158.73        | 265.39        | 219.8        | 626.42        | 509.07        | 785.25        |
| DSMVC   | 261.74       | 886.39        | 802.22        | 865.46       | 1233.89       | 1164.54       | 4130.62       |
| MFL     | 123.81       | 496.78        | 688.11        | 68.31        | 1430.29       | 511.67        | 939.47        |
| CVCL    | <b>97.55</b> | <b>149.05</b> | <b>235.69</b> | <b>41.91</b> | <b>605.12</b> | <b>449.78</b> | <b>687.03</b> |

### 1.1. Investigating the Computational Costs

We compare the proposed CVCL method with the other contrastive learning-based methods in terms of their computational costs. With the enhanced learning capabilities, the importance of the computational cost may become secondary to the improved performance achievable by contrastive learning-based methods. Table 1 shows the running times of all the competing algorithms on all the datasets. It is clear that CVCL performs more efficiently than the other algorithms. This demonstrates the advantages of the proposed CVCL method in terms of computational efficiency.

### 1.2. Discussion

The instances of a sample from different views may sit on different underlying distributions. This means that the contrastive learning of the high-level and low-level features may not be reasonable in MFL [1]. For a given sample, the results of cluster assignments of its instances from multiple views trend to be consistent in CVCL. In contrast with MFL, CVCL ensures consistency among the cluster assignments produced from multiple views. The semantic label of each sample can be predicted using Eq. (14). Moreover, we provide a theoretical analysis for soft cluster assignment alignment. This explains why CVCL performs significantly better than MFL on some of the datasets.

\*Corresponding author

## 2. Detailed Proofs

### 2.1. Proof of Theorem 1

**Theorem 1** Assume that there are  $N$  samples and  $K$  clusters. Given two views  $v_1$  and  $v_2$  and  $l^{(v_1, v_2)}$  in Eq. (6), the following inequality holds:

$$l^{(v_1, v_2)} \geq e^{\log(2K-1) - N/\tau}.$$

**Proof** Let  $\mathbf{p}_j^{(v_1)}$  and  $\mathbf{p}_j^{(v_2)}$  be the  $j$ th columns of  $\mathbf{P}^{(v_1)}$  and  $\mathbf{P}^{(v_2)}$ , respectively. The  $i$ th elements  $p_{ij}^{(v_1)}$  and  $p_{ij}^{(v_2)}$  in  $\mathbf{p}_j^{(v_1)}$  and  $\mathbf{p}_j^{(v_2)}$  represent the cluster assignment probabilities, i.e.,  $0 \leq p_{ij}^{(v_1)} \leq 1$  and  $0 \leq p_{ij}^{(v_2)} \leq 1$ , respectively, where  $1 \leq i \leq N$ . Thus, we have

$$0 \leq s(\mathbf{p}_j^{(v_1)}, \mathbf{p}_j^{(v_2)}) \leq N \quad \text{and} \quad e^{s(\mathbf{p}_j^{(v_1)}, \mathbf{p}_j^{(v_2)})} \geq 1.$$

Suppose that

$$l = \frac{e^{s(\mathbf{p}_k^{(v_1)}, \mathbf{p}_k^{(v_2)})/\tau}}{\sum_{j=1, j \neq k}^K e^{s(\mathbf{p}_j^{(v_1)}, \mathbf{p}_k^{(v_1)})/\tau} + \sum_{j=1}^K e^{s(\mathbf{p}_j^{(v_1)}, \mathbf{p}_k^{(v_2)})/\tau}}$$

and we obtain

$$\begin{aligned} \log l &= \log \left( \frac{e^{s(\mathbf{p}_k^{(v_1)}, \mathbf{p}_k^{(v_2)})/\tau}}{\sum_{j=1, j \neq k}^K e^{s(\mathbf{p}_j^{(v_1)}, \mathbf{p}_k^{(v_1)})/\tau} + \sum_{j=1}^K e^{s(\mathbf{p}_j^{(v_1)}, \mathbf{p}_k^{(v_2)})/\tau}} \right) \\ &= s(\mathbf{p}_k^{(v_1)}, \mathbf{p}_k^{(v_2)})/\tau \\ &\geq \log(2K-1) - N/\tau. \end{aligned}$$

Hence,

$$l^{(v_1, v_2)} \geq e^{\log(2K-1) - N/\tau}.$$

□

## 2.2. Proof of Theorem 2

**Theorem 2** For  $n_v$  given views of multiview data,  $L_c$  in Eq. (7) is minimized if  $f$  is strictly aligned  $\forall v_1, v_2 \in \{1, 2, \dots, n_v\}$  and  $v_1 \neq v_2$ .

**Proof** According to  $\mathbf{p}_i^{(v_1)} = \mathbf{p}_i^{(v_2)}$  and the result of  $p_{ik}^{(v_1)}$ , we obtain

$$s\left(\mathbf{p}_i^{(v_1)}, \mathbf{p}_i^{(v_2)}\right) = \left(\mathbf{p}_i^{(v_1)}\right)^T \mathbf{p}_i^{(v_2)} = k_i$$

where  $k_i$  equals the number of samples in the  $i$ th cluster. Similarly,

$$s\left(\mathbf{p}_i^{(v_1)}, \mathbf{p}_j^{(v_1)}\right) = s\left(\mathbf{p}_i^{(v_1)}, \mathbf{p}_j^{(v_2)}\right) = 0.$$

Hence,

$$l^{(v_1, v_2)} = e^{\log(2K-1) - N/\tau}.$$

This shows that  $L_c$  in Eq. (7) is minimized.  $\square$

## References

- [1] J. Xu, H. Tang, Y. Ren, L. Peng, X. Zhu, and L. He. Multi-level feature learning for contrastive multi-view clustering. In *Proc. IEEE Conf. Comput. Vis. Pattern Recognit.*, pages 16051–16060, New Orleans, Louisiana, USA, Jun. 2022. 1
